# Supplementary material
Source: PubMed Central journal article supplement (PMC7960130)
Supplement: 15-00540.pdf [file 15-00540.pdf]

**On-line Table: Evolution of the main postoperative MR imaging findings in patients treated for STSCH<sup>a</sup>**

|          | SC Realignment |         | SC Dural Adhesion |         | T2WI SI Longitudinal Extension |         | T2WI SI Conspicuity |         | SC Thickness |         | SC Siderosis |         | Anterior Fluid Collection |         | Posterior Fluid Collection |         |
|----------|----------------|---------|-------------------|---------|--------------------------------|---------|---------------------|---------|--------------|---------|--------------|---------|---------------------------|---------|----------------------------|---------|
|          | E>I-MRI        | I>L-MRI | E>I-MRI           | I>L-MRI | E>I-MRI                        | I>L-MRI | E>I-MRI             | I>L-MRI | E>I-MRI      | I>L-MRI | E>I-MRI      | I>L-MRI | E>I-MRI                   | I>L-MRI | E>I-MRI                    | I>L-MRI |
|          | 12             | 0       | 10                | 12      | 10                             | 10      | 8                   | 8       | 3            | 4       | 12           | 11      | 6                         | 6       | 2                          | 10      |
| Stable   | 12             | 0       | 10                | 12      | 10                             | 10      | 8                   | 8       | 3            | 4       | 12           | 11      | 6                         | 6       | 2                          | 10      |
| Variable | 0              | 0       | 2                 | 0       | 2                              | 2       | 4                   | 4       | 9            | 8       | 0            | 1       | 6                         | 6       | 10                         | 2       |

**Note:**—SC indicates spinal cord; SI, signal intensity.

<sup>a</sup>Stability or variability of MR imaging findings was assessed relative to the previous MR imaging study. Values represent the number of patients, from a total of 12 patients. I-MRI findings were compared with those of E-MRI (E>I); L-MRI findings were compared with those of I-MRI (I>L).
